# Supplementary material
Source: Royal Society of Chemistry journal article supplement (doi:10.1039/d6tc00826g)
Supplement: d6tc00826g1.pdf [file d6tc00826g1.pdf]

## Electronic Supporting Information

### Impact of Mg<sup>2+</sup> and Zn<sup>2+</sup> substitution on the structure, magnetic anisotropy and magnetostriction of NiFe<sub>2</sub>O<sub>4</sub>

M. Satish <sup>a</sup>, H. M. Shashanka <sup>a</sup>, Sujoy Saha <sup>b</sup>, V. R. Reddy<sup>c</sup>, B. Sahoo\*<sup>d</sup>, P. N.  
Anantharamaiah\*<sup>a</sup>

<sup>a</sup>*Department of Chemistry, Faculty of Natural Sciences, M. S. Ramaiah University of Applied  
Sciences, Bengaluru-560058, India*

<sup>b</sup>*Department of Basic Sciences, School of Sciences and Humanities, SR University,  
Warangal-506371, India*

<sup>c</sup>*UGC-DAE Consortium for Scientific Research India, University Campus, Khandwa Road, Indore  
452001, India*

<sup>d</sup>*Materials Research Centre, Indian Institute of Science, Bengaluru-560012, India*

*E-mail:* [anantharamaiah.cy.mp@msruas.ac.in](mailto:anantharamaiah.cy.mp@msruas.ac.in)

[bsahoo@iisc.ac.in](mailto:bsahoo@iisc.ac.in)

**Table S1:** List of maximum magnetostriction strain ( $\lambda_{max}$ ) values reported for the sintered polycrystalline NFO and its derivative samples. All these values are along the longitudinal direction.

| Compositions                                                           | Synthesis method       | Sintering temperature (°C) and time | $\lambda_{max}$ (ppm) | H @ $\lambda_{max}$ (kOe) | Reference* |
|------------------------------------------------------------------------|------------------------|-------------------------------------|-----------------------|---------------------------|------------|
| NiFe <sub>2</sub> O <sub>4</sub>                                       | Spark plasma sintering | 1000;1h                             | -37                   | ~2                        | R1         |
| NiFe <sub>2</sub> O <sub>4</sub>                                       | Sol-gel                | 1200; 12h                           | -27                   | ~4                        | R2         |
| NiFe <sub>2</sub> O <sub>4</sub>                                       | Tartrate-gel           | 1200; 2h                            | -25                   | ~1.7                      | R3         |
| NiFe <sub>2</sub> O <sub>4</sub>                                       | Autocombustion         | 1200; 2h                            | -35                   | ~3                        | R4         |
| Ni <sub>0.75</sub> Zn <sub>0.25</sub> Fe <sub>1.8</sub> O <sub>4</sub> | Sol-gel                | 1200; 12h                           | -20                   | ~4                        | R2         |
| Ni <sub>0.50</sub> Zn <sub>0.50</sub> Fe <sub>1.8</sub> O <sub>4</sub> | Sol-gel                | 1200; 12h                           | -9                    | ~4                        | R2         |
| Ni <sub>0.75</sub> Cu <sub>0.25</sub> Fe <sub>1.8</sub> O <sub>4</sub> | Autocombustion         | 1200; 2h                            | -24                   | ~1.3                      | R5         |
| Ni <sub>0.50</sub> Cu <sub>0.50</sub> Fe <sub>1.8</sub> O <sub>4</sub> | Autocombustion         | 1200; 2h                            | -34                   | ~1.7                      | R5         |
| NiMg <sub>0.2</sub> Fe <sub>1.8</sub> O <sub>4</sub>                   | Tartrate-gel           | 1200; 2h                            | -22                   | ~3.1                      | R3         |
| NiIn <sub>0.2</sub> Fe <sub>1.8</sub> O <sub>4</sub>                   | Tartrate-gel           | 1200; 2h                            | -25                   | ~1.5                      | R3         |
| NiGa <sub>0.25</sub> Fe <sub>1.75</sub> O <sub>4</sub>                 | Autocombustion         | 1200; 2h                            | -28                   | ~3                        | R6         |
| NiGa <sub>0.50</sub> Fe <sub>1.50</sub> O <sub>4</sub>                 | Autocombustion         | 1200; 2h                            | -22                   | ~3                        | R6         |
| NiFe <sub>1.95</sub> Nd <sub>0.05</sub> O <sub>4</sub>                 | Solid state            | 1250; 12h                           | -25                   | ~3.5                      | R7         |
| NiFe <sub>1.95</sub> Gd <sub>0.05</sub> O <sub>4</sub>                 | Solid state            | 1250; 12h                           | -27                   | ~4.5                      | R7         |

References:

R1. Alex Aubert; Vincent Loyau; Frédéric Mazaleyrat; Martino LoBue, IEEE Transactions on Magnetics 57, 2021, 2501105

R2. M. Atif, M. Nadeem, R. Grössinger, and R. S.Turtelli, *J. Alloys Compd.*, 2011, **509**, 5720-5724.

R3. P. N. Anantharamaiah, B. P. Rao, H. M. Shashanka, J. A. Chelvane, V. Khopkar, and , B. Sahoo, *Phys. Chem. Chem. Phys.*, 2021, **23**, 1694-1705

R4. M. Satish, H. M. Shashanka, S. Saha, K. Haritha, D. Das, P. N. Anantharamaiah, and C.V. Ramana, *ACS Appl. Mater. Interfaces*, 2023, **15**, 15691-15706.

R5. M. Satish, H. M. Shashanka, S. Saha, S., D. N. Singh, and P. N. Anantharamaiah, *J. Magn. Magn. Mater.* 2023, **585**, 171113.

R6. H. M. Shashanka, D. N. Singh, J. A. Chelvane, and P. N. Anantharamaiah, 2024. *Inorg. Chem. Commun.*, 2024, **161**, 112029.

R7. K. K Bharathi, J. A. Chelvane, and G. Markandeyulu, 2009. Magnetolectric properties of Gd and Nd-doped nickel ferrite. *J. Magn. Magn. Mater.*, 2009, **321**, 3677-3680.

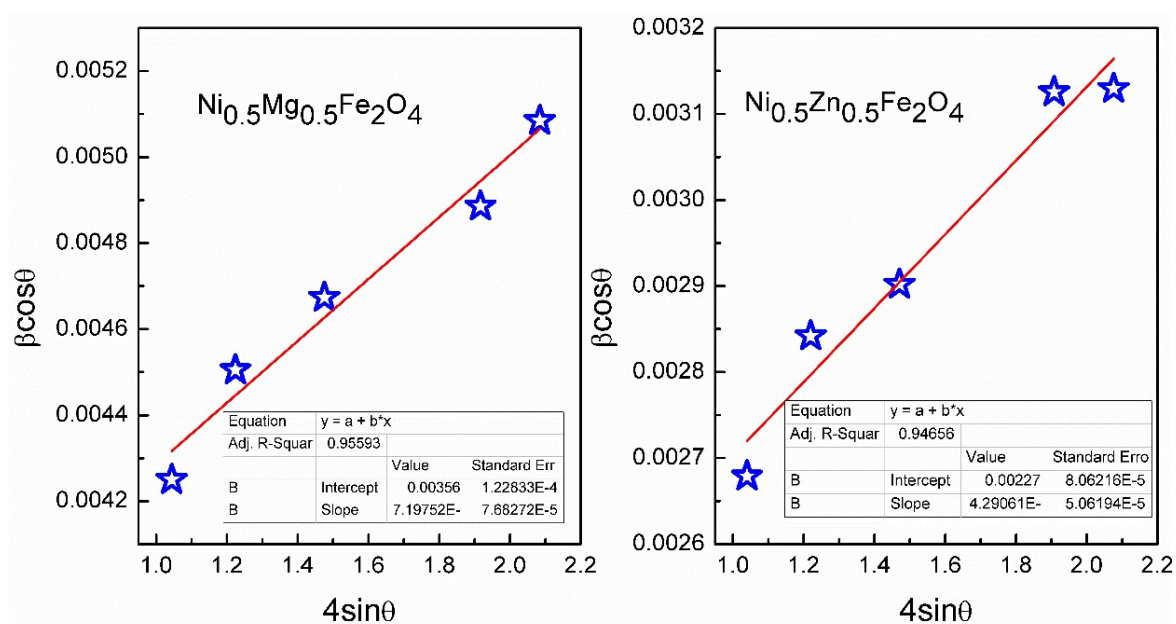

**Fig. S1.** Williamson-Hall plots for the as-synthesized  $\text{Ni}_{0.5}\text{Mg}_{0.5}\text{Fe}_2\text{O}_4$  and  $\text{Ni}_{0.5}\text{Zn}_{0.5}\text{Fe}_2\text{O}_4$  samples.

**Table S2.** Average crystallite size ( $D_v$ ), strain ( $\epsilon$ ), lattice parameter ( $a$ ) and theoretical density ( $\rho$ ) of the as-synthesized  $Ni_{1-x}Mg_xFe_2O_4$  series of samples.

| Sample   | ' $D_v$ ' (nm) | $\epsilon_{\text{strain}} \times 10^{-4}$ | ' $a$ '(Å) | $\rho_{\text{theor.}}$ (g/cm <sup>3</sup> ) |
|----------|----------------|-------------------------------------------|------------|---------------------------------------------|
| $x=0$    | 69             | 4.32                                      | 8.345      | 5.356                                       |
| $x=0.25$ | 40             | 2.59                                      | 8.346      | 5.158                                       |
| $x=0.5$  | 39             | 7.19                                      | 8.347      | 4.960                                       |
| $x=0.75$ | 36             | 9.19                                      | 8.358      | 4.746                                       |
| $x=1$    | 33             | 11.5                                      | 8.372      | 4.526                                       |

**Table S3.** Average crystallite size ( $D_v$ ), strain ( $\epsilon$ ), lattice parameter ( $a$ ) and theoretical density ( $\rho$ ) of the as-synthesized  $Ni_{1-x}Zn_xFe_2O_4$  series of samples.

| Sample   | ' $D_v$ ' (nm) | $\epsilon_{\text{strain}} \times 10^{-4}$ | ' $a$ '(Å) | $\rho_{\text{theor.}}$ (g/cm <sup>3</sup> ) |
|----------|----------------|-------------------------------------------|------------|---------------------------------------------|
| $x=0$    | 69             | 4.32                                      | 8.345      | 5.356                                       |
| $x=0.25$ | 52             | 7.12                                      | 8.355      | 5.375                                       |
| $x=0.5$  | 61             | 4.29                                      | 8.374      | 5.377                                       |
| $x=0.75$ | 62             | 2.98                                      | 8.396      | 5.372                                       |
| $x=1$    | 63             | 4.29                                      | 8.424      | 5.349                                       |

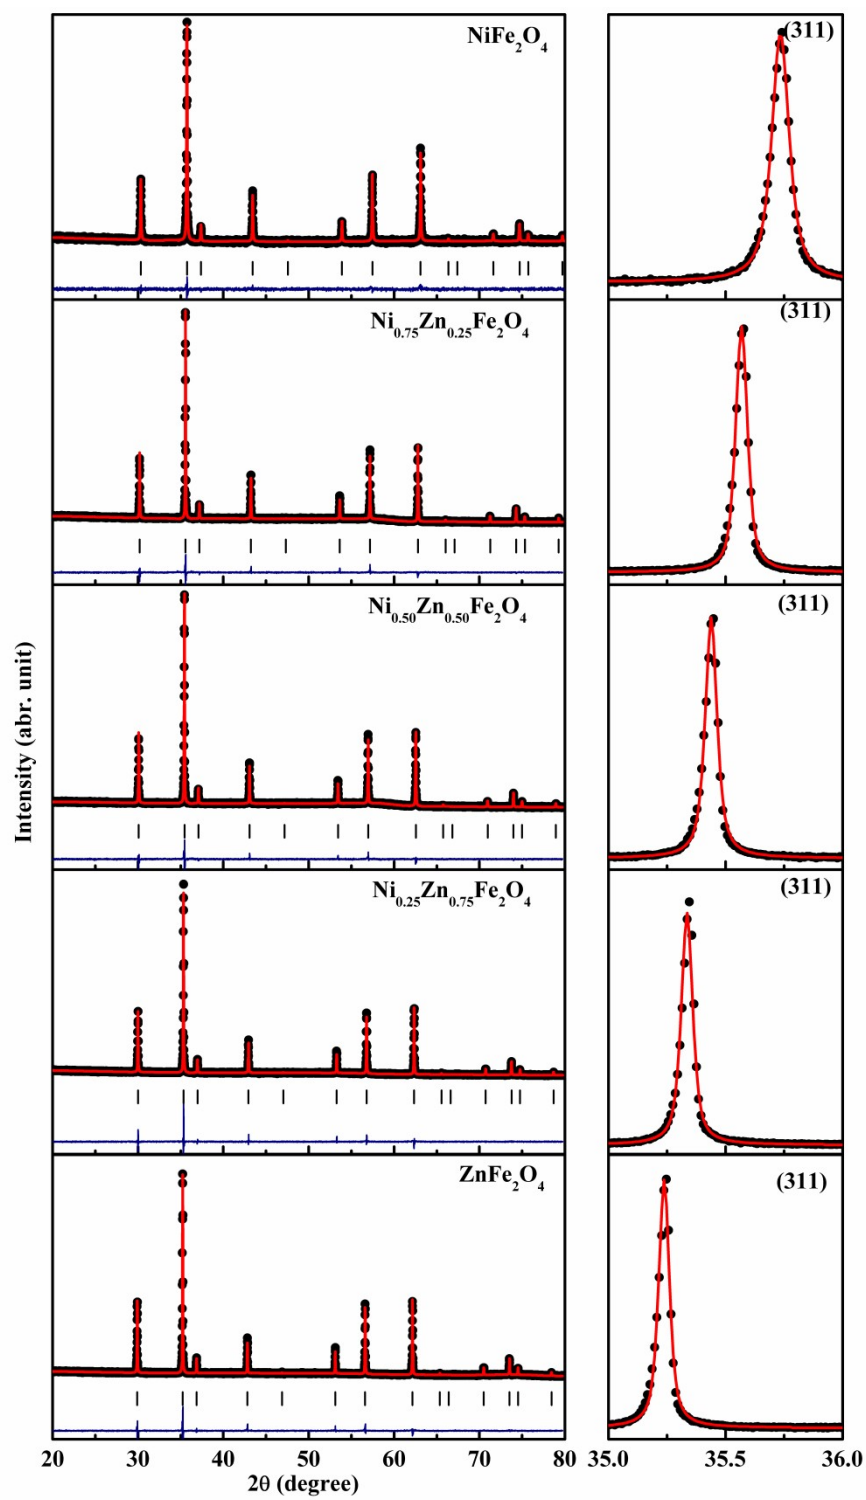

**Fig. S2.** Rietveld fit XRD patterns of sintered Zn-substituted  $\text{NiFe}_2\text{O}_4$  samples shown in the left panel. Variation in the 311 peak position with increasing the Zn content is shown in the right panel.

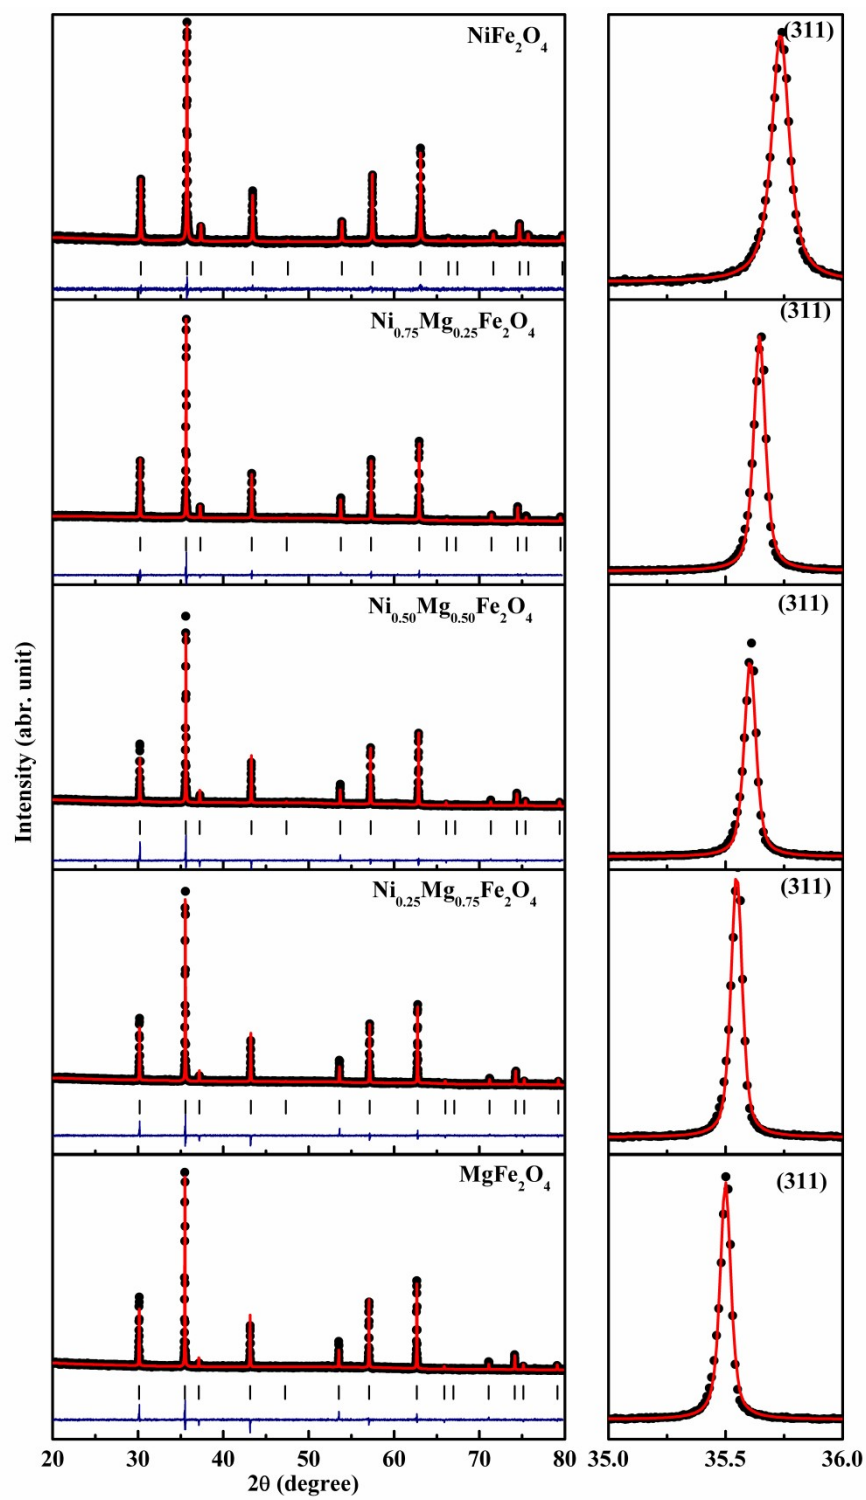

**Fig. S3.** Rietveld fit XRD patterns of sintered Mg-substituted  $\text{NiFe}_2\text{O}_4$  samples shown in the left panel. Variation in the 311 peak position with increasing the Mg content is shown in the right panel.

**Table S4.** Refined lattice constants, atomic parameters and isotropic thermal parameters of the  $\text{Ni}_{1-x}\text{Zn}_x\text{Fe}_2\text{O}_4$  ( $x = 0, 0.25, 0.50, 0.75$  and  $1.0$ ).

|                           | $x = 0$ | $x = 0.25$ | $x = 0.5$ | $x = 0.75$ | $x = 1.0$ |
|---------------------------|---------|------------|-----------|------------|-----------|
| a (Å)                     | 8.32665 | 8.36429    | 8.39397   | 8.41766    | 8.44032   |
| B <sub>iso</sub> (A site) | 0.761   | 1.281      | 1.241     | 1.312      | 1.121     |
| B <sub>iso</sub> (B site) | 0.761   | 1.273      | 1.159     | 1.190      | 0.887     |
| O (x, x, x)               | 0.25557 | 0.25944    | 0.26074   | 0.26126    | 0.26178   |
| R <sub>p</sub>            | 2.10    | 1.79       | 1.80      | 1.94       | 1.96      |
| R <sub>wp</sub>           | 2.66    | 2.56       | 2.63      | 3.13       | 3.06      |
| R <sub>exp</sub>          | 2.44    | 1.60       | 1.59      | 1.65       | 1.67      |
| $\chi^2$                  | 1.19    | 2.56       | 2.75      | 3.57       | 3.38      |

**Table S5.** Refined lattice constants, atomic parameters and isotropic thermal parameters of the  $\text{Ni}_{1-x}\text{Mg}_x\text{Fe}_2\text{O}_4$  ( $x = 0, 0.25, 0.50, 0.75$  and  $1.0$ ).

|                           | $x = 0$ | $x = 0.25$ | $x = 0.5$ | $x = 0.75$ | $x = 1.0$ |
|---------------------------|---------|------------|-----------|------------|-----------|
| a (Å)                     | 8.32665 | 8.34682    | 8.35598   | 8.36911    | 8.37994   |
| B <sub>iso</sub> (A site) | 0.761   | 0.834      | 1.0       | 1.0        | 1.0       |
| B <sub>iso</sub> (B site) | 0.761   | 1.734      | 1.0       | 1.0        | 1.0       |
| O (x, x, x)               | 0.25557 | 0.25694    | 0.25916   | 0.25951    | 0.26169   |
| R <sub>p</sub>            | 2.10    | 1.69       | 1.81      | 1.75       | 1.72      |
| R <sub>wp</sub>           | 2.66    | 2.46       | 3.02      | 2.72       | 2.75      |
| R <sub>exp</sub>          | 2.44    | 1.57       | 1.56      | 1.58       | 1.58      |
| $\chi^2$                  | 1.19    | 2.46       | 3.78      | 2.95       | 3.05      |

**Table S6:** The positions of the Raman band obtained after deconvolution for the different compositions in  $\text{Ni}_{1-x}\text{Zn}_x\text{Fe}_2\text{O}_4$ .

| Series                                 |                                                                                    | $\text{Ni}_{1-x}\text{Zn}_x\text{Fe}_2\text{O}_4$ |            |            |            |           |
|----------------------------------------|------------------------------------------------------------------------------------|---------------------------------------------------|------------|------------|------------|-----------|
| Compositions                           |                                                                                    | $x = 0.0$                                         | $x = 0.25$ | $x = 0.50$ | $x = 0.75$ | $x = 1.0$ |
| $A_{1g}(1)\text{-Fe}^{3+}$             | 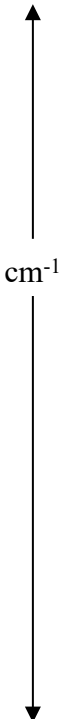 | 702.20                                            | 704        | 702.1      | 698        | .....     |
| $A_{1g}(1)^*$                          |                                                                                    | 660.0                                             | 662        | 661.2      | 659        | .....     |
| $A_{1g}(2)\text{-Zn}^{2+}$             |                                                                                    | .....                                             | 636        | 636.5      | 638        | 636       |
| $A_{1g}(2)^*\text{-Zn}^{2+}$           |                                                                                    | .....                                             | 682        | 692        | 684        | 685       |
| $T_{2g}(3)\text{-Fe}^{3+}$             |                                                                                    | 590                                               | 580        | 565        | 565        | 545       |
| $T_{2g}(3)\text{-Ni}^{2+}$             |                                                                                    | 567                                               | 560        | 535        | 540        | .....     |
| $T_{2g}(2)\text{-Fe}^{2+}$             |                                                                                    | 493                                               | 500        | 500        | 505        | 500       |
| $T_{2g}(2)\text{-Ni}^{2+}$             |                                                                                    | 481                                               | 486        | 483        | 484        | .....     |
| $T_{2g}(2)^*\text{-Fe}^{2+}$           |                                                                                    | 462                                               | 477        | 470        | 468        |           |
| $T_{2g}(2)^*\text{-Ni}^{2+}$           |                                                                                    | 447                                               | 484        | 450        | 450        | .....     |
| $E_g(1)\text{-Fe}^{3+}/\text{Zn}^{2+}$ |                                                                                    | 332.2                                             | 336        | 338        | 340        | 355       |
| $E_g(2)^*\text{-Zn}^{2+}$              |                                                                                    | .....                                             | 315        | 318        | 315        | 340       |
| $E_g(1)^*$                             |                                                                                    | 380                                               | 381        | 377        | 372        | .....     |
| $T_{2g}(1)$                            |                                                                                    | 212                                               | 200        | .....      | .....      | .....     |

**Table S7:** The positions of the Raman band obtained after deconvolution for the different compositions in  $\text{Ni}_{1-x}\text{Mg}_x\text{Fe}_2\text{O}_4$

| Series                                     |                                                                                    | $\text{Ni}_{1-x}\text{Mg}_x\text{Fe}_2\text{O}_4$ |            |            |            |           |
|--------------------------------------------|------------------------------------------------------------------------------------|---------------------------------------------------|------------|------------|------------|-----------|
| Compositions                               |                                                                                    | $x = 0.0$                                         | $x = 0.25$ | $x = 0.50$ | $x = 0.75$ | $x = 1.0$ |
| $A_{1g}(1)$ - $\text{Fe}^{3+}$             | 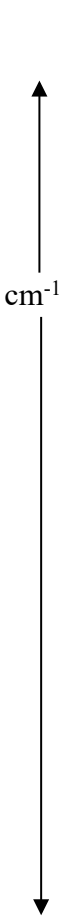 | 702.20                                            | 699        | 705        | 702        | 705       |
| $A_{1g}(1)^*$ - $\text{Fe}^{3+}$           |                                                                                    | 660.0                                             | 647        | 648        | 643        | 645       |
| $A_{1g}(2)$ - $\text{Mg}^{2+}$             |                                                                                    | .....                                             | 718        | 720        | 718        | 719.20    |
| $A_{1g}(2)^*$ - $\text{Mg}^{2+}$           |                                                                                    | .....                                             | 670        | 672        | 673        | 674       |
| $T_{2g}(3)$ - $\text{Fe}^{3+}$             |                                                                                    | 590                                               | 563        | 565        | 552        | 545       |
| $T_{2g}(3)$ - $\text{Ni}^{2+}$             |                                                                                    | 567                                               | 542        | 548        | 532        |           |
| $T_{2g}(3)$ - $\text{Mg}^{2+}$             |                                                                                    | .....                                             | 585        | 592        | 570        | 560       |
| $T_{2g}(2)$ - $\text{Fe}^{2+}$             |                                                                                    | 493                                               | 482        | 480        | 477        | 475       |
| $T_{2g}(2)$ - $\text{Ni}^{2+}$             |                                                                                    | 481                                               | 459        | 460        | 460        | .....     |
| $T_{2g}(2)$ - $\text{Mg}^{2+}$             |                                                                                    | .....                                             | 507.6      | 502        | 495        | 500       |
| $T_{2g}(2)^*$ - $\text{Fe}^{2+}$           |                                                                                    | 462                                               | .....      | .....      | .....      | 460       |
| $T_{2g}(2)^*$ - $\text{Ni}^{2+}$           |                                                                                    | 447                                               | .....      | .....      | .....      | .....     |
| $T_{2g}(2)^*$ - $\text{Mg}^{2+}$           |                                                                                    |                                                   | .....      | .....      | .....      | 485       |
| $E_g(1)$ - $\text{Fe}^{3+}/\text{Mg}^{2+}$ |                                                                                    | 332.2                                             | 330        | 334        | 330.7      | 332.74    |
| $E_g(2)^*$ - $\text{Mg}^{2+}$              | .....                                                                              | 303                                               | 300        | 303        | 300        |           |
| $E_g(1)^*$                                 | 380                                                                                | 380                                               | 387        | 375        | 380.5      |           |
| $T_{2g}(1)$                                | 212                                                                                | 210                                               | 214        | 214        | 215        |           |
| $T_{2g}(1)^*$                              | .....                                                                              | 200                                               | 193        | 203        | 212        |           |

**Table S8.** The magnetic parameters of the sintered  $\text{Ni}_{1-x}\text{Mg}_x\text{Fe}_2\text{O}_4$  samples.

| 'x' in<br>$\text{Ni}_{1-x}\text{Mg}_x\text{Fe}_2\text{O}_4$ | $M_S$<br>(emu/g) | $H_C$<br>(Oe) | $K_1 \times 10^6$<br>(erg/cm <sup>3</sup> ) | $T_C$<br>(°C) |
|-------------------------------------------------------------|------------------|---------------|---------------------------------------------|---------------|
| 0                                                           | 48               | 55            | 0.80                                        | 592           |
| 0.25                                                        | 40               | 27            | 0.19                                        | 532           |
| 0.5                                                         | 32               | 27            | 0.14                                        | 481           |
| 0.75                                                        | 30               | 25            | 0.12                                        | 415           |
| 1                                                           | 23               | 25            | 0.07                                        | 368           |

**Table S9.** The magnetic parameters of the sintered  $\text{Ni}_{1-x}\text{Zn}_x\text{Fe}_2\text{O}_4$  samples.

| 'x' in<br>$\text{Ni}_{1-x}\text{Zn}_x\text{Fe}_2\text{O}_4$ | $M_S$<br>(emu/g) | $H_C$<br>(Oe) | $K_1 \times 10^6$<br>(erg/cm <sup>3</sup> ) | $T_C$<br>(°C) |
|-------------------------------------------------------------|------------------|---------------|---------------------------------------------|---------------|
| 0                                                           | 48               | 55            | 0.80                                        | 592           |
| 0.25                                                        | 71               | 16            | 0.68                                        | 431           |
| 0.5                                                         | 74               | 6             | 0.58                                        | 270           |
| 0.75                                                        | 26 @ 15kOe       | -             | -                                           | 50            |
| 1                                                           | Paramagnetic     | -             | -                                           | -             |
